# Supplementary material for: Genetic diversity and population structure of the endangered basal angiosperm Brasenia schreberi (Cabombaceae) in China
Source: PeerJ. 2018 Jul 13;6:e5296. doi: 10.7717/peerj.5296 (PMC6047506; doi:10.7717/peerj.5296)
Supplement: Supplemental Information 2 — */ **/ *** Significant difference (P < 0.1/ 0.05/ 0.001). [file peerj-06-5296-s002.docx]

**Table S2.** Pairwise *F*st values (below the diagonal) and Nei’s genetic distances (above the diagonal) among the 21 sampled populations of *B. schreberi*

|  | HZXH | XGLHT | CQSZ | HZTJH | NXQZS | SZDSZ | SZLTS | YNGLG | YNTC | MSGH | YTLHS | LBMH | CLHL | GDSYD | QYBSZ | QYSYH | SCHSY | NDXFS | ZYFS | LCFBS | TWYL |
| --- | --- | --- | --- | --- | --- | --- | --- | --- | --- | --- | --- | --- | --- | --- | --- | --- | --- | --- | --- | --- | --- |
| HZXH | - | 0.207 | 0.304 | 0.135 | 0.199 | 0.125 | 0.068 | 0.205 | 0.301 | 0.278 | 0.259 | 0.323 | 0.280 | 0.234 | 0.343 | 0.304 | 0.288 | 0.268 | 0.284 | 0.294 | 0.187 |
| XGLHT | 0.353*** | - | 0.250 | 0.315 | 0.056 | 0.251 | 0.198 | 0.114 | 0.203 | 0.392 | 0.338 | 0.271 | 0.268 | 0.362 | 0.348 | 0.251 | 0.328 | 0.368 | 0.218 | 0.299 | 0.218 |
| CQSZ | 0.328*** | 0.364*** | - | 0.405 | 0.210 | 0.245 | 0.294 | 0.206 | 0.125 | 0.459 | 0.354 | 0.143 | 0.293 | 0.365 | 0.330 | 0.332 | 0.269 | 0.262 | 0.151 | 0.100 | 0.326 |
| HZTJH | 0.303*** | 0.545*** | 0.521*** | - | 0.307 | 0.241 | 0.161 | 0.331 | 0.397 | 0.333 | 0.264 | 0.341 | 0.322 | 0.272 | 0.285 | 0.263 | 0.225 | 0.203 | 0.390 | 0.361 | 0.318 |
| NXQZS | 0.273*** | 0.126** | 0.247*** | 0.489*** | - | 0.204 | 0.194 | 0.085 | 0.168 | 0.329 | 0.274 | 0.226 | 0.220 | 0.312 | 0.222 | 0.207 | 0.254 | 0.257 | 0.178 | 0.226 | 0.179 |
| SZDSZ | 0.133*** | 0.373*** | 0.269*** | 0.394*** | 0.284*** | - | 0.132 | 0.249 | 0.275 | 0.311 | 0.245 | 0.229 | 0.303 | 0.250 | 0.372 | 0.374 | 0.339 | 0.267 | 0.242 | 0.196 | 0.161 |
| SZLTS | 0.044** | 0.374*** | 0.358*** | 0.358*** | 0.317*** | 0.169*** | - | 0.222 | 0.285 | 0.303 | 0.271 | 0.338 | 0.329 | 0.269 | 0.383 | 0.364 | 0.341 | 0.313 | 0.341 | 0.319 | 0.225 |
| YNGLG | 0.361*** | 0.278*** | 0.307*** | 0.548*** | 0.162*** | 0.364*** | 0.408*** | - | 0.175 | 0.394 | 0.275 | 0.211 | 0.217 | 0.298 | 0.229 | 0.149 | 0.237 | 0.261 | 0.147 | 0.239 | 0.182 |
| YNTC | 0.335*** | 0.355*** | 0.159*** | 0.501*** | 0.239*** | 0.315*** | 0.369*** | 0.307*** | - | 0.386 | 0.261 | 0.148 | 0.184 | 0.270 | 0.290 | 0.283 | 0.274 | 0.331 | 0.252 | 0.237 | 0.257 |
| MSGH | 0.380*** | 0.566*** | 0.526*** | 0.528*** | 0.474*** | 0.406*** | 0.423*** | 0.565*** | 0.494*** | - | 0.296 | 0.375 | 0.365 | 0.305 | 0.393 | 0.468 | 0.432 | 0.381 | 0.460 | 0.424 | 0.372 |
| YTLHS | 0.303*** | 0.411*** | 0.340*** | 0.383*** | 0.313*** | 0.266*** | 0.354*** | 0.356*** | 0.270*** | 0.395*** | - | 0.189 | 0.150 | 0.205 | 0.320 | 0.306 | 0.288 | 0.322 | 0.313 | 0.285 | 0.265 |
| LBMH | 0.334*** | 0.362*** | 0.165*** | 0.430*** | 0.265*** | 0.249*** | 0.380*** | 0.295*** | 0.168*** | 0.436*** | 0.152*** | - | 0.151 | 0.265 | 0.286 | 0.234 | 0.211 | 0.264 | 0.146 | 0.111 | 0.257 |
| CLHL | 0.358*** | 0.411*** | 0.332*** | 0.470*** | 0.308*** | 0.338*** | 0.416*** | 0.364*** | 0.245*** | 0.466*** | 0.118*** | 0.155*** | - | 0.181 | 0.227 | 0.185 | 0.199 | 0.277 | 0.209 | 0.245 | 0.205 |
| GDSYD | 0.314*** | 0.521*** | 0.433*** | 0.437*** | 0.436*** | 0.302*** | 0.378*** | 0.473*** | 0.386*** | 0.459*** | 0.268*** | 0.313*** | 0.289*** | - | 0.270 | 0.256 | 0.229 | 0.235 | 0.299 | 0.321 | 0.204 |
| QYBSZ | 0.562*** | 0.629*** | 0.530*** | 0.572*** | 0.459*** | 0.561*** | 0.609*** | 0.493*** | 0.503*** | 0.625*** | 0.478*** | 0.449*** | 0.463*** | 0.559*** | - | 0.093 | 0.104 | 0.100 | 0.275 | 0.335 | 0.285 |
| QYSYH | 0.521*** | 0.516*** | 0.504*** | 0.531*** | 0.428*** | 0.540*** | 0.579*** | 0.329*** | 0.478*** | 0.654*** | 0.446*** | 0.401*** | 0.429*** | 0.526*** | 0.353*** | - | 0.096 | 0.153 | 0.183 | 0.326 | 0.220 |
| SCHSY | 0.475*** | 0.558*** | 0.414*** | 0.442*** | 0.449*** | 0.492*** | 0.534*** | 0.449*** | 0.434*** | 0.615*** | 0.398*** | 0.339*** | 0.391*** | 0.461*** | 0.366*** | 0.321*** | - | 0.074 | 0.256 | 0.236 | 0.274 |
| NDXFS | 0.423*** | 0.564*** | 0.382*** | 0.406*** | 0.423*** | 0.410*** | 0.487*** | 0.434*** | 0.457*** | 0.564*** | 0.405*** | 0.352*** | 0.422*** | 0.418*** | 0.302*** | 0.361*** | 0.194*** | - | 0.223 | 0.215 | 0.262 |
| ZYFS | 0.432*** | 0.384*** | 0.238*** | 0.623*** | 0.298*** | 0.380*** | 0.493*** | 0.241*** | 0.401*** | 0.617*** | 0.408*** | 0.275*** | 0.396*** | 0.505*** | 0.598*** | 0.459*** | 0.516*** | 0.450*** | - | 0.120 | 0.196 |
| LCFBS | 0.439*** | 0.516*** | 0.151*** | 0.605*** | 0.372*** | 0.339*** | 0.491*** | 0.402*** | 0.388*** | 0.597*** | 0.359*** | 0.184*** | 0.382*** | 0.508*** | 0.620*** | 0.593*** | 0.452*** | 0.430*** | 0.323*** | - | 0.273 |
| TWYL | 0.260*** | 0.357*** | 0.341*** | 0.486*** | 0.251*** | 0.218*** | 0.325*** | 0.255*** | 0.314*** | 0.490*** | 0.288*** | 0.287*** | 0.284*** | 0.334*** | 0.492*** | 0.421*** | 0.452*** | 0.411*** | 0.327*** | 0.397*** | - |

*/ **/ *** Significant difference (*P* < 0.1/ 0.05/ 0.001)
